# Supplementary material for: Mutation Signatures and In Silico Docking of Novel SARS-CoV-2 Variants of Concern
Source: MDPI journal article supplement (doi:10.3390/microorganisms9050926), 2021-04-26
Supplement: s1 [file s1]

Supplementary Table 1. We gratefully acknowledge the following Authors from the Originating laboratories responsible for obtaining the specimens and the Submitting laboratories where genetic sequence data were generated and shared via the GISAID Initiative, on which this research is based.

<https://zenodo.org/record/4596537>

DOI: 10.5281/zenodo.4596537

| Virus name                              | Accession No.  | Collected  | Originating laboratory                                                                                         | Submitting laboratory                                                                                                   | Authors                                                                                                                                                                                                                                                                                                                                                      |
|-----------------------------------------|----------------|------------|----------------------------------------------------------------------------------------------------------------|-------------------------------------------------------------------------------------------------------------------------|--------------------------------------------------------------------------------------------------------------------------------------------------------------------------------------------------------------------------------------------------------------------------------------------------------------------------------------------------------------|
| hCoV-19/Wuhan/IPBCAMS-WH-01/2019        | EPI_ISL_402123 | 2019-12-24 | Institute of Pathogen Biology, Chinese Academy of Medical Sciences & Peking Union Medical College              | Institute of Pathogen Biology, Chinese Academy of Medical Sciences & Peking Union Medical College                       | Lili Ren, Jianwei Wang, Qi Jin, Zichun Xiang, Zhiqiang Wu, Chao Wu, Yiwei Liu                                                                                                                                                                                                                                                                                |
| hCoV-19/Pakistan/JRCGR-KHI20/2020       | EPI_ISL_779276 | 2020-07-02 | Jamil-ur-Rahman Center for Genome Research, Dr. Panjwani Center for Molecular Medicine and Drug Research       | Jamil-ur-Rahman Center for Genome Research, Dr. Panjwani Center for Molecular Medicine and Drug Research                | Shakeel,M., Irfan,M., Nisa,Z., Rashid,M., Ansari,S., Khan,I.                                                                                                                                                                                                                                                                                                 |
| hCoV-19/USA/CA-CDC-8/2020               | EPI_ISL_411955 | 2020-02-10 | California Department of Public Health                                                                         | Pathogen Discovery, Respiratory Viruses Branch, Division of Viral Diseases, Centers for Diseases Control and Prevention | Krista Queen, Anna Uehara, Jing Zhang, Yan Li, Ying Tao, Clinton R. Paden, Haibin Wang, Shifao Kamili, Xiaoyan Lu, Brian Lynch, Senthil Kumar K. Sakthivel, Brett L. Whitaker, Lijuan Wang, Janna' R. Murray, Susan I. Gerber, Stephen Lindstrom, Suxiang Tong                                                                                               |
| hCoV-19/Finland/20MS4A4/2020            | EPI_ISL_757368 | 2020-03-20 | Department of Virology and Immunology, University of Helsinki and Helsinki University Hospital, Huslab Finland | Department of Virology, Faculty of Medicine, University of Helsinki, Helsinki, Finland                                  | Teemu Smura, Ravi Kant, Phuoc Truong, Hussein Alburkat, Hannimari Kallio-Kokko, Jenni Virtanen, Maija Suvanto, Sari Hannula, Harri Kangas, Pekka Ellonen, Olli Vapalahti                                                                                                                                                                                     |
| hCoV-19/Germany/BE-ChVir-D716-2070/2020 | EPI_ISL_753822 | 2020-03-05 | Charité Universitätsmedizin Berlin, Institut für Virologie/Labor Berlin                                        | Charité Universitätsmedizin Berlin, Institut für Virologie                                                              | Victor M Corman, Jörn Beheim-Schwarzbach, Barbara Mühlemann, Julia Schneider, Talitha Veith, Terry Jones, Christian Drosten                                                                                                                                                                                                                                  |
| hCoV-19/Malaysia/UNIMAS-M4061/2020      | EPI_ISL_718165 | 2020-05-11 | Ministry of Health Hospitals                                                                                   | Institute of Health and Community Medicine                                                                              | David Perera, Ooi Mong How, Chua Hock Hin, Tonnii Sia Loong Loong, Wong Jyn Shan, Wong Kiing Aik, Chan Chia Jui                                                                                                                                                                                                                                              |
| hCoV-19/United Arab Emirates/0555/2020  | EPI_ISL_698716 | 2020-05-19 | Group 42 (G42) Healthcare, Abu Dhabi, United Arab Emirates; Department of Health, The United Arab Emirates     | G42 Healthcare                                                                                                          | Rong Liu, Pei Wu, Sally Mahmoud, Ke Liang, Pauline Ogrodzki, Pengjuan Liu, Stephen S. Francis, Tao Ma, Hanif Khalak, Fang Chen, Denghui Liu, Junhua Li, Weibin Liu, Wenjun He, Xinyu Huang, Zhaorong Yuan, Long Lin, Nan Qiao, Xin Meng, Budoor Alqarni, Javier Quilez, Vinay Kusuma, Xin Jin, Xavier Anton, Ashish Koshy, Huanming Yang, Xun Xu, Jian Wang, |

|                                          |                |            |                                                                                                                                                |                                                                                                                                                   |                                                                                                                                                                                                                                                                                                                                                                                                                                                                                                          |
|------------------------------------------|----------------|------------|------------------------------------------------------------------------------------------------------------------------------------------------|---------------------------------------------------------------------------------------------------------------------------------------------------|----------------------------------------------------------------------------------------------------------------------------------------------------------------------------------------------------------------------------------------------------------------------------------------------------------------------------------------------------------------------------------------------------------------------------------------------------------------------------------------------------------|
|                                          |                |            |                                                                                                                                                |                                                                                                                                                   | Peng Xiao, Nawal Ahmed Mohamed Al Kaabi, Mohammed Saifuddin Fasihuddin, Siyang Liu, Walid Abbas Zaher                                                                                                                                                                                                                                                                                                                                                                                                    |
| hCoV-19/Japan/PG-1665/2020               | EPI_ISL_685271 | 2020-04    | Pathogen Genomics Center, National Institute of Infectious Diseases                                                                            | Pathogen Genomics Center, National Institute of Infectious Diseases                                                                               | Tsuyoshi Sekizuka, Kentaro Itokawa, Rina Tanaka, Masanori Hashino, Makoto Kuroda                                                                                                                                                                                                                                                                                                                                                                                                                         |
| hCoV-19/Canada/QC-LSPQ-L00220832/2020    | EPI_ISL_535804 | 2020-03-14 | Centre de SSS de la Haute-Yamaska                                                                                                              | Laboratoire de santé publique du Québec                                                                                                           | Sandrine Moreira, Ioannis Ragoussis, Guillaume Bourque, Jesse Shapiro, Mark Lathrop and Michel Roger                                                                                                                                                                                                                                                                                                                                                                                                     |
| hCoV-19/USA/WI-WSLH-201413/2020          | EPI_ISL_803638 | 2020-03-18 | Wisconsin State Laboratory of Hygiene Communicable Disease Division                                                                            | Wisconsin State Laboratory of Hygiene Communicable Disease Division                                                                               | Kelsey R. Florek, Abigail C. Shockey                                                                                                                                                                                                                                                                                                                                                                                                                                                                     |
| hCoV-19/Chile/Santiago-PUC_MVL_0016/2020 | EPI_ISL_801607 | 2020-03-19 | Laboratory of Molecular Virology, Pontificia Universidad Católica de Chile                                                                     | MSHS Pathogen Surveillance Program                                                                                                                | Leonardo I. Almonacid, Ana S. Gonzalez-Reiche, Matthew M. Hernandez, Jorge Levican, Ana Maria Contreras, Carlos Palma, Tamara Garcia-Salum, Zenab Khan, Adriana van De Guchte, Ajay Obla, Jayeeta Dutta, Bremy Albuquerque, Eileen Serrano, Constanza Maldonado, M. Belen Leyton, Erick Salinas, Hala Alshammary, Juan Soto, Shwetha Hara Sridhar, Ying-Chih Wang, Melissa Smith, Robert Sebra, Marcela Ferres, Adolfo Garcia-Sastre, Edward C. Holmes, Viviana Simon, Harm van Bakel, Rafael A. Medina. |
| hCoV-19/England/ALDP-D41394/2020         | EPI_ISL_798369 | 2020-12-27 | Lighthouse Lab in Alderley Park                                                                                                                | Wellcome Sanger Institute for the COVID-19 Genomics UK (COG-UK) Consortium                                                                        | Jacquelyn Wynn, Mairead Hyland, The Lighthouse Lab in Alderley Park and Alex Alderton, Roberto Amato, Sonia Goncalves, Ewan Harrison, David K. Jackson, Ian Johnston, Dominic Kwiatkowski, Cordelia Langford, John Sillitoe on behalf of the Wellcome Sanger Institute COVID-19 Surveillance Team                                                                                                                                                                                                        |
| hCoV-19/Spain/VC-IBV-98006975/2020       | EPI_ISL_796151 | 2020-03-23 | Servicio de Microbiología. Hospital General Universitario de Castellón                                                                         | SeqCOVID-SPAIN consortium/IBV(CSIC)                                                                                                               | Rosario Moreno Muñoz, María Dolores Tirado Balaguer and SeqCOVID-SPAIN consortium                                                                                                                                                                                                                                                                                                                                                                                                                        |
| hCoV-19/Mexico/NLE-UANL-001/2020         | EPI_ISL_779169 | 2020-03-16 | Laboratorio de Infectología, Servicio de Infectología, Hospital Universitario Dr. José Eleuterio González - Universidad Autónoma de Nuevo León | Laboratorio de Infectología Molecular, Departamento de Bioquímica y Medicina Molecular, Facultad de Medicina - Universidad Autónoma de Nuevo León | Kame A. Galán-Huerta, María F. Herrera-Saldivar, Natalia Martínez-Acuña, Sonia A. Lozano-Sepúlveda, Daniel Arellanos-Soto, Ana M. Rivas-Estilla, Paola Bocanegra-Ibarias, Samantha M. Flores-Treviño, Elvira Garza-                                                                                                                                                                                                                                                                                      |

|                                    |                |            |                                                                                                                                        |                                                                                                                                                                                                                            |                                                                                                                                                                                                                                        |
|------------------------------------|----------------|------------|----------------------------------------------------------------------------------------------------------------------------------------|----------------------------------------------------------------------------------------------------------------------------------------------------------------------------------------------------------------------------|----------------------------------------------------------------------------------------------------------------------------------------------------------------------------------------------------------------------------------------|
|                                    |                |            |                                                                                                                                        |                                                                                                                                                                                                                            | González, Eduardo Perez-Alba, Laura Nuzzolo-Shihadeh, Adrian Camacho-Ortiz                                                                                                                                                             |
| hCoV-19/South Korea/KDCA0341/2020  | EPI_ISL_760127 | 2020-07-21 | Division of Emerging Infectious Diseases, Bureau of Infectious Diseases Diagnosis Control, Korea Disease Control and Prevention Agency | Division of Emerging Infectious Diseases, Bureau of Infectious Diseases Diagnosis Control, Korea Disease Control and Prevention Agency                                                                                     | e Kyung Park, Il-Hwan Kim, Heui Man Kim, Jeong-Min Kim, Namjoo Lee, Chaeyoung Lee, Sang Hee Woo, Eun-Jin Kim                                                                                                                           |
| hCoV-19/Uganda/UG129/2020          | EPI_ISL_738036 | 2020-09-01 | Uganda Central Public Health Lab and Uganda Virus Research Institute                                                                   | MRC/UVRI & LSHTM Uganda Research Unit                                                                                                                                                                                      | Matthew Cotten, Dan Lule Bugembe, My V.T. Phan, Pontiano Kaleebu.                                                                                                                                                                      |
| hCoV-19/Belgium/reg-0416499/2020   | EPI_ISL_734591 | 2020-04-16 | UZ Leuven, National Reference Laboratory for Coronaviruses, Laboratory Medicine, Leuven, Belgium                                       | KU Leuven, Rega Institute, Clinical and Epidemiological Virology                                                                                                                                                           | Tony Wawina-Bokalanga, Joan Marti-Carerras, Bert Vanmechelen, Piet Maes                                                                                                                                                                |
| hCoV-19/Nigeria/BO-CV345/2020      | EPI_ISL_730010 | 2020-05-08 | Nigeria Centre for Disease Control (NCDC)                                                                                              | African Centre of Excellence for Genomics of Infectious Diseases (ACEGID), Redeemer's University, Ede, Osun State, Nigeria                                                                                                 | Oluniyi P.E. et al                                                                                                                                                                                                                     |
| hCoV-19/Wuhan/WH04/2020            | EPI_ISL_406801 | 2020-01-05 | General Hospital of Central Theater Command of People's Liberation Army of China                                                       | BGI & Institute of Microbiology, Chinese Academy of Sciences & Shandong First Medical University & Shandong Academy of Medical Sciences & General Hospital of Central Theater Command of People's Liberation Army of China | Weijun Chen, Yuhai Bi, Weifeng Shi and Zhenhong Hu                                                                                                                                                                                     |
| hCoV-19/Spain/VC-IBV-98005532/2020 | EPI_ISL_796130 | 2020-05-14 | Laboratorio de Microbiología. Hospital General Universitario de Elda, Alicante                                                         | SeqCOVID-SPAIN consortium/IBV(CSIC)                                                                                                                                                                                        | Isabel Gascón Ros, Cristina Torregrosa Hetland, Eva Pastor Boix, Paloma Cascales Ramos and SeqCOVID-SPAIN consortium                                                                                                                   |
| hCoV-19/Australia/WA529/2020       | EPI_ISL_794701 | 2020-03-25 | PathWest Laboratory Medicine WA                                                                                                        | PathWest Laboratory Medicine WA Microbial Surveillance Unit                                                                                                                                                                | PathWest Laboratory Medicine WA Microbial Surveillance Unit                                                                                                                                                                            |
| hCoV-19/Argentina/PAIS-B0003/2020  | EPI_ISL_792399 | 2020-05-30 | Laboratorio de Virología del Hospital de Niños Dr. Ricardo Gutierrez                                                                   | Biocódices SA. on behalf of 'Proyecto Argentino Interinstitucional de genomica de SARS-CoV-2' (PAIS Consortium)                                                                                                            | Gravis, E; Acevedo, ME; Alvarez Lopez, C; Alexay, S; Jacques, O; Mistchenko, Zubrzycki J, Berros JM, Dopazo H                                                                                                                          |
| hCoV-19/USA/MA-MASPHL-00003/2020   | EPI_ISL_791515 | 2020-03-05 | Massachusetts State Public Health Laboratory                                                                                           | Infectious Disease Program, Broad Institute of Harvard and MIT                                                                                                                                                             | Lemieux,J.E., Siddle,K.J., Shaw,B., Adams,G., Pierce,V., Turbett,S., Anahtar,M., Branda,J., Slater,D., Harris,J., Lin,A.E., Gladden-Young,A., Lagerborg,K., Rudy,M., DeRuff,K., Carter,A., Normandin,E., Bauer,M., Reilly,S., Tomkins- |

|                                    |                |            |                                                                            |                                                                                                                             |                                                                                                                                                                                                                                                                                                                                                                                                                                                                                                                                                                                                                                                                                                                                                                                            |
|------------------------------------|----------------|------------|----------------------------------------------------------------------------|-----------------------------------------------------------------------------------------------------------------------------|--------------------------------------------------------------------------------------------------------------------------------------------------------------------------------------------------------------------------------------------------------------------------------------------------------------------------------------------------------------------------------------------------------------------------------------------------------------------------------------------------------------------------------------------------------------------------------------------------------------------------------------------------------------------------------------------------------------------------------------------------------------------------------------------|
|                                    |                |            |                                                                            |                                                                                                                             | Tinch,C., Loreth,C., Chaluvadi,S., Neumann,A., Cusick,C., Chapman,S.B., Gnirke,A., Flowers,K., Cerrato,F., Birren,B.W., Gallagher,G., Smole,S., Park,D.J., MacInnis,B.L., Ryan,E., LaRocque,R., Rosenberg,E. and Sabeti,P.C.                                                                                                                                                                                                                                                                                                                                                                                                                                                                                                                                                               |
| hCoV-19/Germany/NI-hpi-p1746/2020  | EPI_ISL_776552 | 2020-03-14 | University Medical Center Hamburg Eppendorf                                | Heinrich Pette Institute, Leibniz Institute for Experimental Virology                                                       | Alexis Robitaille, Thomas Günther, Johannes Knobloch, Martin Aepfelbacher, Nicole Fischer, Adam Grundhoff                                                                                                                                                                                                                                                                                                                                                                                                                                                                                                                                                                                                                                                                                  |
| hCoV-19/Hong Kong/HKPU64-1202/2020 | EPI_ISL_419232 | 2020-02-19 | Department of Clinical Pathology, Pamela Youde Nethersole Eastern Hospital | Department of Health Technology and Informatics, Faculty of Health and Social Science, The Hong Kong Polytechnic University | Kenneth Siu-Sing LEUNG, Timothy Ting-Leung NG, Alan Ka-Lun WU, Miranda Chong-Yee YAU, Hiu-Yin LAO, Ming-Pan CHOI, Kingsley King-Gee TAM, Lam-Kwong LEE, Barry Kin-Chung WONG, Alex Yat-Man HO, Kam-Tong YIP, Kwok-Cheung LUNG, Raymond Wai-To LIU, Eugene Yuk-Keung TSO, Wai-Shing LEUNG, Man-Chun CHAN, Yuk-Yung NG, Kit-Man SIN, Kitty Sau-Chun FUNG, Sandy Ka-Yee CHAU, Wing-Kin TO, Tak-Lun QUE, David Ho-Keung SHUM, Shea Ping YIP, Wing Cheong YAM, Gilman Kit-Hang SIU                                                                                                                                                                                                                                                                                                              |
| hCoV-19/Iceland/13/2020            | EPI_ISL_417765 | 2020-02-27 | The National University Hospital of Iceland                                | deCODE genetics                                                                                                             | Daniel F Gudbjartsson; Agnar Helgason; Hakon Jonsson; Olafur T Magnusson; Pall Melsted; Gudmundur L Norddahl; Jona Saemundsdottir; Asgeir Sigurdsson; Patrick Sulem; Arna B Agustsdottir; Berglind Eiríksdottir; Run Fridriksdottir; Elisabet E Gardarsdottir; Gudmundur Georgsson; Olafía S Gretarsdottir; Kjartan R Gudmundsson; Thora R Gunnarsdottir; Arnaldur Gylfason; Hilma Holm; Brynjar O Jensson; Aslaug Jonasdottir; Kamilla S Josefsdottir; Thordur Kristjansson; Droplaug N Magnusdottir; Louise le Roux; Gudrun Sigmundsdottir; Gardar Sveinbjornsson; Kristin E Sveinsdottir; Maney Sveinsdottir; Emil A Thorarensen; Bjarni Thorbjornsson; Gisli Masson; Ingileif Jonsdottir; Alma Moller; Thorolfur Gudnason; Karl G Kristinsson; Unnur Thorsteinsdottir; Kari Stefansson |
| hCoV-19/Brazil/SP-02/2020          | EPI_ISL_413016 | 2020-02-28 | Hospital Israelita Albert Einstein                                         | Instituto Adolfo Lutz, Interdisciplinary                                                                                    | Jaqueline Goes de Jesus, Claudio Tavares Sacchi,                                                                                                                                                                                                                                                                                                                                                                                                                                                                                                                                                                                                                                                                                                                                           |

|                                  |                |            |                                                                                                                                           |                                                                                                                                           |                                                                                                                                                                                                                                                                |
|----------------------------------|----------------|------------|-------------------------------------------------------------------------------------------------------------------------------------------|-------------------------------------------------------------------------------------------------------------------------------------------|----------------------------------------------------------------------------------------------------------------------------------------------------------------------------------------------------------------------------------------------------------------|
|                                  |                |            |                                                                                                                                           | Procedures Center, Strategic Laboratory                                                                                                   | Fabiana Cristina Pereira dos Santos, Ingra Morales Claro, Flávia Cristina da Silva Sales, Claudia Regina Gonçalves, Joshua Quick, Maria do Carmo Sampaio Tavares Timenetsky, Nicholas James Loman, Andrew Rambaut, Ester Cerdeira Sabino, Nuno Rodrigues Faria |
| hCoV-19/USA/OR_5430/2020         | EPI_ISL_420794 | 2020-03-01 | Oregon State Public Health- Virology section                                                                                              | Pathogen Discovery, Respiratory Viruses Branch, Division of Viral Diseases, Centers for Disease Control and Prevention                    | Krista Queen, Yan Li, Ying Tao, Jing Zhang, Anne Uehara, Clinton R. Paden, Haibin Wang, Rachel Marine, Mary S. Keckler, Alison S. Laufer Halpin, Jasmine Padilla, Justin Lee, Christopher A. Elkins, Suxiang Tong                                              |
| hCoV-19/France/BRE-2340/2020     | EPI_ISL_416507 | 2020-03-05 | CHRU Pontchaillou - Laboratoire de Virologie                                                                                              | National Reference Center for Viruses of Respiratory Infections, Institut Pasteur, Paris                                                  | Mélnie Albert, Marion Barbet, Sylvie Behillil, Méline Bizard, Angela Brisebarre, Flora Donati, Etienne Simon-Lorière, Vincent Enouf, Maud Vanpeene, Sylvie van der Werf, Gisèle Lagathu                                                                        |
| hCoV-19/Italy/LOM-ASST-CDG1/2020 | EPI_ISL_412973 | 2020-02-20 | Department of Infectious Diseases, Istituto Superiore di Sanità, Roma , Italy                                                             | Virology Laboratory, Scientific Department, Army Medical Center                                                                           | Paola Stefanelli, Stefano Fiore, Antonella Marchi, Eleonora Benedetti, Concetta Fabiani, Giovanni Faggioni, Antonella Fortunato, Riccardo De Santis, Silvia Fillo, Anna Anselmo, Andrea Ciammaruconi, Stefano Palomba, Florigio Lista                          |
| hCoV-19/env/Beijing/BJ2452/2020  | EPI_ISL_430743 | 2020-03-14 | Chinese PLA Institute for Disease Control and Prevention                                                                                  | Chinese PLA Institute for Disease Control and Prevention                                                                                  | Peng Li, Jinhui Li, Lizhong Li                                                                                                                                                                                                                                 |
| hCoV-19/Morocco/refstage1/2020   | EPI_ISL_476559 | 2020-02-27 | Laboratoire Sciences et Technologies de la Santé (STS) Institut Supérieur des Sciences de la Santé Université Hassan 1er, Settat, Morocco | Laboratoire Sciences et Technologies de la Santé (STS) Institut Supérieur des Sciences de la Santé Université Hassan 1er, Settat, Morocco | Hajar Lemriss, Sanaâ Lemriss, Amal Souiri, Narjis Amar, Mustapha Mouallif, Touria Essayagh, Jawad Bouzid, Saâd EL Kabbaj, Abderraouf Hilali                                                                                                                    |
| hCoV-19/Belarus/ChVir2073/2020   | EPI_ISL_419693 | 2020-03    | The Republican Research and Practical Center for Epidemiology and Microbiology                                                            | Charité Universitätsmedizin Berlin, Institute of Virology                                                                                 | Victor M Corman, Julia Schneider, Barbara Mühlemann, Talitha Veith, Jörn Beheim-Schwarzbach, Terry Jones, Natallia Shmialiova, Natallia Sivets, Christian Drosten                                                                                              |
| hCoV-19/Ecuador/USFQ-563/2020    | EPI_ISL_824286 | 2020-12-28 | Institute of Microbiology, Universidad San Francisco de Quito                                                                             | Institute of Microbiology, Universidad San Francisco de Quito                                                                             | Belén Prado-Vivar, Sully Márquez, Juan José Guadalupe, Monica Becerra-Wong, Bernardo Gutiérrez, Andrea Cunguan, Nabih Dahik, Verónica Barragán, Patricio Rojas-Silva, Gabriel Trueba, Michelle Grunauer, Paúl Cárdenas                                         |

|                                    |                |            |                                                                                                                                                                     |                                                                                                                                                                                                                                                                                                                                                                        |                                                                                                                                                                                                                                                                                                                        |
|------------------------------------|----------------|------------|---------------------------------------------------------------------------------------------------------------------------------------------------------------------|------------------------------------------------------------------------------------------------------------------------------------------------------------------------------------------------------------------------------------------------------------------------------------------------------------------------------------------------------------------------|------------------------------------------------------------------------------------------------------------------------------------------------------------------------------------------------------------------------------------------------------------------------------------------------------------------------|
| hCoV-19/Canada/BC_20534610/2020    | EPI_ISL_462776 | 2020-03    | BCCDC Public Health Laboratory                                                                                                                                      | BCCDC Public Health Laboratory                                                                                                                                                                                                                                                                                                                                         | Harrigan, Prystajacky, Krajden, Lee, Kamelian, Lapointe, Choi, Hoang, Sekirov, Levett, Tyson, Li, Gilmour                                                                                                                                                                                                              |
| hCoV-19/Palestine/14/2020          | EPI_ISL_596503 | 2020-03-10 | Palestinian Ministry of Health                                                                                                                                      | Molecular Genetics Lab                                                                                                                                                                                                                                                                                                                                                 | Nouar Qutob, Zaidoun Salah, Damien Richard, Hisham Darwish, Husam Sallam, Issa Shtayeh, Osama Najjar, Mahmoud Ruzayqat, Dana Najjar, Francois Balloux, Lucy van Dorp                                                                                                                                                   |
| hCoV-19/Spain/MD-IBV-99013198/2020 | EPI_ISL_831083 | 2020-05-02 | Hospital Universitario La Paz (Madrid)                                                                                                                              | SeqCOVID-SPAIN consortium/IBV(CSIC)                                                                                                                                                                                                                                                                                                                                    | María Rodríguez-Tejedor, Elias Dahdouh, Fernando Lázaro-Perona, Jesús Mingorance and SeqCOVID-SPAIN consortium                                                                                                                                                                                                         |
| hCoV-19/Japan/PG-2735/2020         | EPI_ISL_690867 | 2020-03    | Pathogen Genomics Center, National Institute of Infectious Diseases                                                                                                 | Pathogen Genomics Center, National Institute of Infectious Diseases                                                                                                                                                                                                                                                                                                    | Tsuyoshi Sekizuka, Kentaro Itokawa, Rina Tanaka, Masanori Hashino, Makoto Kuroda                                                                                                                                                                                                                                       |
| hCoV-19/Egypt/CUNCI-HGC5I003/2020  | EPI_ISL_479711 | 2020-06-02 | Egyptian National Cancer Institute (ENCI)                                                                                                                           | Egyptian National Cancer Institute (ENCI)                                                                                                                                                                                                                                                                                                                              | Zekri, Abdel Rahman N, Amer,K.E., Ahmed,O.S., Soliman,H.K., Hafez,M.M., Bahnassy,A.A., Abdelhamid,W., Gad,A., Ali,M., Hassan,W., Samir,M., Raouf,A., Hamdy,M.S., Soliman,M.S., Elsissey,M.H., Elkhateeb,S.M., Ezzelarab,M.H., Abouelhoda, Mohamed                                                                      |
| hCoV-19/Tunisia/12-8274/2020       | EPI_ISL_803817 | 2020-04-07 | Laboratory of Microbiology, National Reference Lab, Charles Nicolle Hospital; 2-University of Tunis ElManar, Faculty of Medicine of Tunis, LR99ES09, Tunis, Tunisia | Clinical and Experimental Pharmacology Lab, LR16SP02, National Center of Pharmacovigilance, University of Tunis El Manar, Tunis, Tunisia. 2-Neurodegenerative diseases and psychiatric troubles, LR18SP03, Razi Hospital, University of Tunis El Manar, Tunis, Tunisia. 3- Ministry of Health, National Observatory of New and Emerging Diseases, 1006, Tunis, Tunisia | Ilhem Boutiba-Ben Boubaker, Sameh Trabelsi, Nissaf Ben Alaya, Maher Kharrat, Alia BenKahla, Jalila Ben Khelil, Salma Abid, Sana Ferjani, Mouna Ben Sassi, Mouna Safer, Zaineb Hamzaoui, Habiba Ben Romdhane, Souissi Amira, Sarra Chamman, Hanen El Jebari, Ahmed Fakhfakh, Gaies Emna, Riadh Daghfous, Riadh Gouider. |
| hCoV-19/USA/OH-JML-COH119/2021     | EPI_ISL_832378 | 2021-01-06 | Ohio State                                                                                                                                                          | James Molecular Lab                                                                                                                                                                                                                                                                                                                                                    | Huolin Tu, Matthew R Avenarius, Laura Kubatko, Matthew Hunt, Xiaokang Pan, Peng Ru, Jason Garee, Keelie Thomas, Peter Mohler, Preeti Pancholi, Dan Jones                                                                                                                                                               |
| hCoV-19/Saudi Arabia/656/2020      | EPI_ISL_490010 | 2020-02-26 | King Fahad Medical City                                                                                                                                             | King Fahad Medical City                                                                                                                                                                                                                                                                                                                                                | Alosaimi,B., Naeem,A., Alghoraibi,M., Enani,M.                                                                                                                                                                                                                                                                         |
| hCoV-19/India/DL-IGIB11303760/2020 | EPI_ISL_751297 | 2020-03    | Devki Devi Foundation, a unit of Max Healthcare                                                                                                                     | CSIR-IGIB/Max                                                                                                                                                                                                                                                                                                                                                          | Rajesh Pandey#, Samreen Siddiqui, Janani Srinivasa Vasudevan, Akshay Kanakan, Ranjeet                                                                                                                                                                                                                                  |

|                                         |                 |            |                                                                            |                                                                            |                                                                                                                                                                                                                                                                                                                                                           |
|-----------------------------------------|-----------------|------------|----------------------------------------------------------------------------|----------------------------------------------------------------------------|-----------------------------------------------------------------------------------------------------------------------------------------------------------------------------------------------------------------------------------------------------------------------------------------------------------------------------------------------------------|
|                                         |                 |            |                                                                            |                                                                            | Maurya, Uzma Shamim, Bansidhar Tarai, Akansha Tyagi, Mitali Mukerji, Poonam Das, Sujeet Jha, Mohammed Faruq, Anurag Agrawal                                                                                                                                                                                                                               |
| hCoV-19/USA/WA-UW-10277/2020            | EPI_ISL_570288  | 2020-06-02 | UW Virology Lab                                                            | UW Virology Lab                                                            | Pavitra Roychoudhury, Hong Xie, Lasata Shrestha, Amin Addetia, Victoria M Rachleff, Meei-Li Huang, Keith R Jerome, Alexander Greninger                                                                                                                                                                                                                    |
| hCoV-19/Singapore/17/2021               | EPI_ISL_803999  | 2021-01-05 | National Public Health Laboratory, National Centre for Infectious Diseases | National Public Health Laboratory, National Centre for Infectious Diseases | Tze Minn Mak, Sophie Octavia, Zhenyang Zhou, Lin Cui, Raymond Tzer Pin Lin                                                                                                                                                                                                                                                                                |
| hCoV-19/USA/CA-IGI-3379/2021            | EPI_ISL_1060186 | 2021-02-04 | Innovative Genomics Institute, UC Berkeley                                 | Innovative Genomics Institute, UC Berkeley                                 | Stacia Wyman, Alison Ciling, Netravathi Krishnappa, Haridha Shivram, Phil Frankino, Liana Lareau                                                                                                                                                                                                                                                          |
| hCoV-19/Luxembourg/LNS7045208/2020      | EPI_ISL_771095  | 2020-12-28 | Laboratoire national de santé, Microbiology, Virology                      | Laboratoire national de santé, Microbiology, Microbial Genomics Platform   | Anke Wienecke-Baldacchino, Catherine Ragimbeau, Jessica Tapp, Fatu Djabi, Lise Pignon, Raoul Salmon, Tamir Abdelrahman                                                                                                                                                                                                                                    |
| hCoV-19/South Africa/KRISP-K004312/2020 | EPI_ISL_660190  | 2020-10-23 | NHLS-IALCH                                                                 | KRISP, KZN Research Innovation and Sequencing Platform                     | Giandhari J, Pillay S, Lessells R, Mdlalose K, York D, Khan S, Tegally H, Wilkinson E, de Oliveira T                                                                                                                                                                                                                                                      |
| hCoV-19/Germany/NW-MPP-21/2020          | EPI_ISL_487410  | 2020-06-05 | Labor Kneißler GmbH & Co. KG                                               | Heinrich Pette Institute, Leibniz Institute for Experimental Virology      | Thomas Günther, Adam Grundhoff, Manja Czech-Sioli, Nicole Fischer, Matthias Ottinger, Melanie M. Brinkmann                                                                                                                                                                                                                                                |
| hCoV-19/England/MILK-9E05B3/2020        | EPI_ISL_601443  | 2020-09-20 | Lighthouse Lab in Milton Keynes                                            | Wellcome Sanger Institute for the COVID-19 Genomics UK (COG-UK) consortium | The Lighthouse Lab in Milton Keynes and Alex Alderton, Roberto Amato, Sonia Goncalves, Ewan Harrison, David K. Jackson, Ian Johnston, Dominic Kwiatkowski, Cordelia Langford, John Sillitoe on behalf of the Wellcome Sanger Institute COVID-19 Surveillance Team ( <a href="http://www.sanger.ac.uk/covid-team">http://www.sanger.ac.uk/covid-team</a> ) |

|                                          |                |            |                                                                                                   |                                                                                                   |                                                                                                                                                                                                                                                                                                                                                                                                    |
|------------------------------------------|----------------|------------|---------------------------------------------------------------------------------------------------|---------------------------------------------------------------------------------------------------|----------------------------------------------------------------------------------------------------------------------------------------------------------------------------------------------------------------------------------------------------------------------------------------------------------------------------------------------------------------------------------------------------|
| hCoV-19/Germany/BY-ChVir21652/2020       | EPI_ISL_802995 | 2020-12-23 | Charité Universitätsmedizin Berlin, Institut für Virologie, Charitéplatz 1, 10117 Berlin, Germany | Charité Universitätsmedizin Berlin, Institut für Virologie, Charitéplatz 1, 10117 Berlin, Germany | Victor M Corman, Tobias Bleicker, Julia Tesch, Jörn Beheim-Schwarzbach, Barbara Mühlemann, Talitha Veith, Julia Schneider, Terry Jones, Christian Drosten                                                                                                                                                                                                                                          |
| hCoV-19/Portugal/PT2162/2020             | EPI_ISL_796754 | 2020-12-31 | Instituto Nacional de Saude (INSA)                                                                | Instituto Nacional de Saude (INSA)                                                                | Borges et al                                                                                                                                                                                                                                                                                                                                                                                       |
| hCoV-19/Netherlands/NH-RIVM-20989/2020   | EPI_ISL_790573 | 2020-12-30 | Dutch COVID-19 response team                                                                      | National Institute for Public Health and the Environment (RIVM)                                   | Adam Meijer, Harry Vennema, Jeroen Cremer, Sharon van den Brink, Bas van der Veer, AnneMarie van den Brandt, Florian Zwagemaker, Dennis Schmitz, Chantal Reusken, on behalf of the national COVID-19 response team                                                                                                                                                                                 |
| hCoV-19/Japan/IC-0564/2021               | EPI_ISL_792683 | 2021-01-02 | Pathogen Genomics Center, National Institute of Infectious Diseases                               | Pathogen Genomics Center, National Institute of Infectious Diseases                               | Tsuyoshi Sekizuka, Kentaro Itokawa, Rina Tanaka, Masanori Hashino, Makoto Kuroda                                                                                                                                                                                                                                                                                                                   |
| hCoV-19/Bangladesh/BCSIR-NILMRC-091/2020 | EPI_ISL_469300 | 2020-06-02 | National Institute of Laboratory Medicine and Referral Center                                     | Genomic Research Lab, BCSIR                                                                       | Abu Sayeed Mohammad Mahmud, Mohammad Samir Uzzaman, Eshrar Osman, Md. Ahasan Habib, Shahina Akter, Tanjina Akhter Banu, Md. Murshed Hasan Sarkar, Barna Goswami, Iffat Jahan, Md. Saddam Hossain, Tasnim Nafisa, Md. Maruf Ahmed Molla, Mahmuda Yeasmin, Asish Kumar Ghosh, Bayzid Bin Monir, A. K. M. Shamsuzzaman, Sheikh Md. Selim Al Din, Utpal Chandra Ray, Salek Ahmed Sajib, Md. Salim Khan |
| hCoV-19/Uganda/UG136/2020                | EPI_ISL_738043 | 2020-10-01 | Uganda Central Public Health Lab and Uganda Virus Research Institute                              | MRC/UVRI & LSHTM Uganda Research Unit                                                             | Matthew Cotten, Dan Lule Bugembe, My V.T. Phan, Pontiano Kaleebu et al.                                                                                                                                                                                                                                                                                                                            |
| hCoV-19/France/PAC02004/2020             | EPI_ISL_693388 | 2020-02-29 | CHU de Nice - Hôpital Archet 2                                                                    | CNR Virus des Infections Respiratoires - France SUD                                               | Antonin Bal, Géraldine Gonfrier, Gregory Destras, Gwendolyne Burfin, Hadrien Règue, Quentin Semanas, Martine Valette, Bruno Lina, Valérie Giordanengo, Laurence Josset                                                                                                                                                                                                                             |
| hCoV-19/Estonia/ChVir1983/2020           | EPI_ISL_420066 | 2020-03    | Health Board Laboratory of Communicable Diseases                                                  | Charité Universitätsmedizin Berlin, Institute of Virology                                         | Victor M Corman, Jörn Beheim-Schwarzbach, Barbara Mühlemann, Talitha Veith, Julia Schneider, Liidia Dotsenko, Natalja Kuznetsova, Terry Jones, Christian Drosten                                                                                                                                                                                                                                   |
| hCoV-19/Denmark/ALAB-SSI109/2020         | EPI_ISL_429341 | 2020-03-04 | Department of Virus and Microbiological Special Diagnostics, Statens Serum                        | Albertsen lab, Department of Chemistry and Bioscience, Aalborg University, Denmark                | Rasmus Kirkegaard                                                                                                                                                                                                                                                                                                                                                                                  |



|                                         |                |            |                                                                                                                                                                     |                                                                                                                                                                                                                                                                                                                                                                        |                                                                                                                                                                                                                                                                                                                              |
|-----------------------------------------|----------------|------------|---------------------------------------------------------------------------------------------------------------------------------------------------------------------|------------------------------------------------------------------------------------------------------------------------------------------------------------------------------------------------------------------------------------------------------------------------------------------------------------------------------------------------------------------------|------------------------------------------------------------------------------------------------------------------------------------------------------------------------------------------------------------------------------------------------------------------------------------------------------------------------------|
|                                         |                |            | Institut, Copenhagen, Denmark,<br>Artillerivej 5, 2300 Copenahgen S                                                                                                 |                                                                                                                                                                                                                                                                                                                                                                        |                                                                                                                                                                                                                                                                                                                              |
| hCoV-19/USA/TX-HMH-MCoV-14671/2020      | EPI_ISL_787956 | 2020-10-10 | Houston Methodist Hospital                                                                                                                                          | Houston Methodist Hospital                                                                                                                                                                                                                                                                                                                                             | S. Wesley Long, Randall J. Olsen, Paul A. Christensen, David W. Bernard, James J. Davis, Maulik Shukla, Marcus Nguyen, Matthew Ojeda Saavedra, Prasanti Yerramilli, Layne Pruitt, Sishir Subedi, Heather Hendrickson, and James M. Musser                                                                                    |
| hCoV-19/England/QEUI-9966B9/2020        | EPI_ISL_549534 | 2020-08-28 | Oxford Viromics, NDM, University of Oxford; Oxford University Hospitals; Basingstoke and North Hampshire Hospital                                                   | COVID-19 Genomics UK (COG-UK) Consortium                                                                                                                                                                                                                                                                                                                               | Tanya Golubchik, David Bonsall, George Macintyre, Amy Trebes, Mariateresa de Cesare, Catrin Moore, Alex Mobbs, Anita Justice, Robert Shaw, Monique Andersson, Timothy Peto, Emma Wise, Nathan Moore, Jessica Lynch, Nick Cortes, Matilde Mori, Stephen Kidd, David Buck, John Todd, Christophe Fraser                        |
| hCoV-19/Switzerland/GE-ETHZ-321472/2020 | EPI_ISL_603685 | 2020-10-14 | Viollier AG                                                                                                                                                         | Department of Biosystems Science and Engineering, ETH Zürich                                                                                                                                                                                                                                                                                                           | Christian Beisel, Sarah Nadeau, Ivan Topolsky, Pedro Ferreira, Philipp Jablonski, Susana Posada-Céspedes, Tobias Schär, Ina Nissen, Natascha Santacroce, Elodie Bureklen, Christiane Beckmann, Maurice Redondo, Olivier Kobel, Christoph Noppen, Sophie Seidel, Noemie Santamaria de Souza, Niko Beerenwinkel, Tanja Stadler |
| hCoV-19/France/ARA77081/2020            | EPI_ISL_639992 | 2020-09-23 | CNR Virus des Infections Respiratoires - France SUD                                                                                                                 | CNR Virus des Infections Respiratoires - France SUD                                                                                                                                                                                                                                                                                                                    | Antonin Bal, Gregory Destras, Gwendolyne Burfin, Hadrien Règue, Alexandre Gaymard, Maude Bouscambert-Duchamp, Florence Morfin-Sherpa, Martine Valette, Bruno Lina, Laurence Josset                                                                                                                                           |
| hCoV-19/Tunisia/21-2249/2021            | EPI_ISL_803851 | 2021-01-08 | Laboratory of Microbiology, National Reference Lab, Charles Nicolle Hospital; 2-University of Tunis ElManar, Faculty of Medicine of Tunis, LR99ES09, Tunis, Tunisia | Clinical and Experimental Pharmacology Lab, LR16SP02, National Center of Pharmacovigilance, University of Tunis El Manar, Tunis, Tunisia. 2-Neurodegenerative diseases and psychiatric troubles, LR18SP03, Razi Hospital, University of Tunis El Manar, Tunis, Tunisia. 3- Ministry of Health, National Observatory of New and Emerging Diseases, 1006, Tunis, Tunisia | Ilhem Boutiba-Ben Boubaker, Sameh Trabelsi, Nissaf Ben Alaya, Maher Kharrat, Alia BenKahla, Jalila Ben Khelil, Salma Abid, Sana Ferjani, Mouna Ben Sassi, Mouna Safer, Zaineb Hamzaoui, Habiba Ben Romdhane, Souissi Amira, Sarra Chamman, Hanen El Jebari, Ahmed Fakhfakh, Gaies Emna, Riadh Daghfous, Riadh Gouider.       |

|                                         |                |            |                                                                                                                                        |                                                                                                                                        |                                                                                                                                                                                                                                                                                                                                                                                                                                                                                                                                                                                                 |
|-----------------------------------------|----------------|------------|----------------------------------------------------------------------------------------------------------------------------------------|----------------------------------------------------------------------------------------------------------------------------------------|-------------------------------------------------------------------------------------------------------------------------------------------------------------------------------------------------------------------------------------------------------------------------------------------------------------------------------------------------------------------------------------------------------------------------------------------------------------------------------------------------------------------------------------------------------------------------------------------------|
| hCoV-19/Scotland/QEUA-9439A3/2020       | EPI_ISL_532563 | 2020-08-01 | NHSGGC West of Scotland Specialist Virology Centre / MRC-University of Glasgow Centre for Virus Research                               | Wellcome Sanger Institute for the COVID-19 Genomics UK (COG-UK) consortium                                                             | Ana da Silva Filipe, Natasha Johnson, Kathy Smollett, Daniel Mair, Stephen Carmichael, Lily Tong, Jenna Nichols, Elihu Aranday-Cortes, Kirstyn Brunner, Yasmin Parr, Kyriaki Nomikou; Sarah McDonald, Marc Niebel, Patawee Asamaphan; Richard Orton, Joseph Hughes, Sreenu Vattipally, David L Robertson; Alasdair MacLean, Rory Gunson; Kathy Li, Natasha Jesudason, Rajiv Shah, James Shepherd, Antonia Ho, Alice Broos, Emma Thomson and Alex Alderton, Roberto Amato, Sonia Goncalves, Ewan Harrison, David K. Jackson, Ian Johnston, Dominic Kwiatkowski, Cordelia Langford, John Sillitoe |
| hCoV-19/England/210100352/2021          | EPI_ISL_791236 | 2021-01-04 | Respiratory Virus Unit, National Infection Service, Public Health England                                                              | COVID-19 Genomics UK (COG-UK) Consortium                                                                                               | PHE Covid Sequencing Team                                                                                                                                                                                                                                                                                                                                                                                                                                                                                                                                                                       |
| hCoV-19/Switzerland/BL-ETHZ-430638/2020 | EPI_ISL_796426 | 2020-12-30 | Viollier AG                                                                                                                            | Department of Biosystems Science and Engineering, ETH Zürich                                                                           | Chaoran Chen, Sarah Nadeau, Catharine Aquino, Ivan Topolsky, Philipp Jablonski, Lara Fuhrmann, David Dreifuss, Katharina Jahn, Andreia Cabral de Gouvea, Maria Domenica Moccia, Simon Gräter, Timothy Sykes, Lennart Opitz, Griffin White, Laura Neff, Doris Popovic, Andrea Patrignani, Jay Tracy, Ralph Schlapbach, Christiane Beckmann, Maurice Redondo, Olivier Kobel, Christoph Noppen, Sophie Seidel, Noemie Santamaria de Souza, Niko Beerenwinkel, Tanja Stadler                                                                                                                        |
| hCoV-19/South Korea/KDCA0368/2020       | EPI_ISL_760152 | 2020-10-03 | Division of Emerging Infectious Diseases, Bureau of Infectious Diseases Diagnosis Control, Korea Disease Control and Prevention Agency | Division of Emerging Infectious Diseases, Bureau of Infectious Diseases Diagnosis Control, Korea Disease Control and Prevention Agency | Ae Kyung Park, Il-Hwan Kim, Heui Man Kim, Jeong-Min Kim, Namjoo Lee, Chaeyoung Lee, Sang Hee Woo, Eun-Jin Kim                                                                                                                                                                                                                                                                                                                                                                                                                                                                                   |
| hCoV-19/Morocco/LDB-01/2020             | EPI_ISL_723469 | 2020-11    | Laboratoire Biolife                                                                                                                    | Laboratoire de Biotechnologie                                                                                                          | Mouna Ouadghiri, Tarik Aanniz, Mohammed Walid Chemaou Elfihri, Mohamed Chenaoui, Hanae Dakka, Afaf Alaoui, Othmane Touzani, Bouchra Belfquih, Lahecn Belyamani, Saaïd Amzazi and Azeddine Ibrahimi                                                                                                                                                                                                                                                                                                                                                                                              |

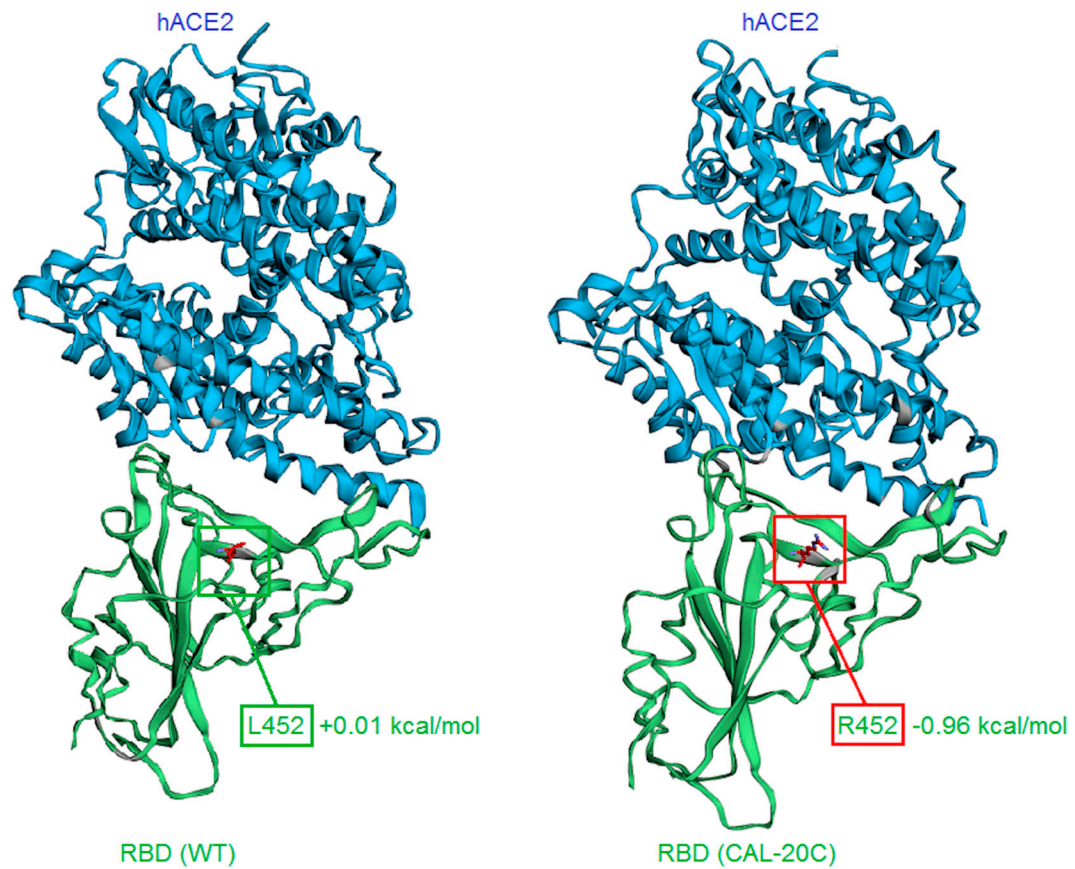

**Supplementary Figure 1.** Structure of the SARS-CoV-2 RBD (green) docked with hACE2 (blue). The mutation is shown with red box. The contribution of residues to the total FEB (kcal/mol) in the RBD-hACE2 docked complexes for WT (left) and CAL-20C (right) are computed using MM/GBSA method.
